# The effects of the neonicotinoid imidacloprid on gene expression and DNA methylation in the buff-tailed bumblebee *Bombus terrestris*

Pshtiwan S.A. Bebane<sup>1\*</sup>, Benjamin J. Hunt<sup>1\*+</sup>, Mirko Pegoraro<sup>2\*</sup>, Alun R.C. Jones<sup>1</sup>, Hollie Marshall<sup>1</sup>, Ezio Rosato<sup>1</sup> and Eamonn B. Mallon<sup>1</sup>

<sup>1</sup>Department of Genetics and Genome Biology, The University of Leicester  
<sup>2</sup>School of Natural Sciences and Psychology, John Moores University, Liverpool  
\*joint first authors  
+corresponding author bh177@le.ac.uk

March 26<sup>th</sup>, 2019

## Abstract

*Neonicotinoids are effective insecticides used on many important arable and horticultural crops. They are nicotinic acetylcholine receptor agonists which disrupt the function of insect neurons and cause paralysis and death. In addition to direct mortality, there are numerous sublethal effects of low doses of neonicotinoids on bees. We hypothesize that some of these large array of effects could be a consequence of epigenetics changes in bees induced by neonicotinoids. We compared whole methylome (BS-seq) and RNA-seq libraries of the brains of buff tailed bumblebee *Bombus terrestris* workers exposed to field realistic doses of the neonicotinoid imidacloprid to libraries from control workers. We found numerous genes which show differential expression between neonicotinoid treated bees and control bees, but no differentially methylated cytosines in any context. We found CpG methylation to be focused mainly in exons and associated with highly expressed genes. We discuss the implications of our results for future legislation.*

**Keywords**— Epigenetics, Methylome, RNA-seq, BS-seq, Social insects, Pesticide

---

## The epigenetic effects of neonicotinoids on bumblebees

### 15 **Introduction**

16 Neonicotinoids are effective insecticides used on many important arable and horticultural crops,  
17 most frequently as seed dressing. They are systemic, meaning they are absorbed by the plant and  
18 transported to all tissues where they remain active for many weeks or months. This protects all parts  
19 of the plant, but also means that neonicotinoids are found in the nectar and pollen of flowering crops  
20 such as oilseed rape, and hence are consumed by bees (Botias *et al.*, 2015). It has also emerged  
21 that they are commonly found contaminating nectar and pollen of wild flowers growing on arable  
22 farmland, providing additional exposure of bees and other pollinators (Botias *et al.*, 2015; David  
23 *et al.*, 2016).

24 Neonicotinoids are nicotinic acetylcholine receptor agonists which disrupt the function  
25 of insect neurons and cause paralysis and death. In addition to direct mortality, laboratory and  
26 field studies have documented numerous sublethal effects of low doses of neonicotinoids on both  
27 honeybees and bumblebees (e.g. Whitehorn *et al.* 2012; Rundlof *et al.* 2015, reviewed in Pisa  
28 *et al.* 2015). Sublethal effects at the individual level include reduced fecundity of queens, reduced  
29 fertility in males, impaired immune response, impaired navigation and learning, reduced pollen  
30 collection and reduced food consumption. Collectively, these effects result in reduced colony  
31 growth and colony reproduction performance. The breadth of the effects of neonicotinoids on bees  
32 suggests that neonicotinoids have multiple modes of action beyond their designed direct impact on  
33 neurotransmission.

34 We hypothesize that some of these effects could be a consequence of epigenetic changes  
35 induced by neonicotinoids. Epigenetics is defined as the stable and heritable change in gene  
36 expression without any change in the DNA sequence (Goldberg *et al.*, 2007). Environmental  
37 contaminants have been found to affect the epigenetics of a diverse range of animal species from

## The epigenetic effects of neonicotinoids on bumblebees

---

38 water fleas to polar bears (Head, 2014) and include metals, endocrine disrupting compounds, air  
39 pollution, persistent organic pollutants and pesticides (Vandeghechuchte and Janssen, 2014), but much  
40 ecotoxicology research is centred on a direct link between exposure and response (Head, 2014).  
41 Epigenetic changes have the potential to weaken that link, with effects possibly manifesting much  
42 later in life or in subsequent generations. Thus if pesticide-induced epigenetic changes were shown  
43 to be heritable in bees this would have implications for future ecological risk assessment.

44 In social insect research the role of DNA methylation, an epigenetic marker primarily  
45 involving the addition of a methyl group to a cytosine, has come under increasing scrutiny in recent  
46 years (Foret *et al.*, 2009; Lyko *et al.*, 2010; Glastad *et al.*, 2013; Amarasinghe *et al.*, 2014; Glastad  
47 *et al.*, 2016; Patalano *et al.*, 2015; Libbrecht *et al.*, 2016; Standage *et al.*, 2016; Rehan *et al.*, 2016;  
48 Glastad *et al.*, 2017; Arsenault *et al.*, 2018). Methylation has important effects on the biology of  
49 bees, including the control of reproductive status (Kucharski *et al.*, 2008; Amarasinghe *et al.*, 2014)  
50 and memory (Biergans *et al.*, 2012), behaviours shown to be affected by neonicotinoids (Williams  
51 *et al.*, 2015; Stanley *et al.*, 2015). DNA methylation has been linked with alternative splicing in a  
52 number of insect species (Lyko *et al.*, 2010; Li-Byarlay *et al.*, 2013; Glastad *et al.*, 2016; Arsenault  
53 *et al.*, 2018). In mammals, methylation on gene promoters leads to a reduction in gene expression.  
54 The effect of methylation on gene expression in insects is less well understood (Pegoraro *et al.*, 2017),  
55 though high levels of methylation have been associated with highly and stably expressed genes  
56 (Foret *et al.*, 2012; Bonasio *et al.*, 2012; Wang *et al.*, 2013), while in honeybees hypomethylated  
57 genes are associated with caste-specific expression (Elango *et al.*, 2009; Marshall *et al.*, 2019).  
58 Gene expression differences due to neonicotinoid exposure have been found in honeybee larval  
59 workers, adult workers and queens (Derecka *et al.*, 2013; Aufauvre *et al.*, 2014; Christen *et al.*, 2016;  
60 Chaimanee *et al.*, 2016; Christen *et al.*, 2018).

61 In this study we use whole genome bisulfite sequencing (WGBS/BS-seq) and RNA-seq on

## The epigenetic effects of neonicotinoids on bumblebees

---

62 brain tissue of neonicotinoid exposed and control *Bombus terrestris* workers in order to elucidate  
63 the effects of the neonicotinoid imidacloprid on the gene expression and methylation status of  
64 bumblebee workers.

## 65 **Materials and Methods**

### 66 **Beekeeping, experimental design and brain dissection**

67 Six colonies of *Bombus terrestris audax* were purchased from Agralan, UK. Each colony contained  
68 a queen and on average ten workers and a small amount of brood. They were kept in wooden nest  
69 boxes and maintained under red light at 26°C and 60% humidity on a diet of 50% v/v apiary solution  
70 (Meliose-Roquette, France) and pollen (Percie du set, France) (Amarasinghe *et al.*, 2014).

71 Groups of 5 callow workers born on the same day were reared in Perspex boxes (18.5 cm  
72 x 12.5cm x 6.5cm). Boxes were then randomly assign to control or treated groups. The control  
73 group was fed *ad libitum* with 50% v/v apiary solution for six days whereas the treated group  
74 was fed *ad libitum* with a 10ppb imidacloprid (SIGMA-ALDRICH) 50% v/v apiary solution, a  
75 field-realistic sub-lethal dose (Cresswell, 2011; Blacquièrè *et al.*, 2012). After six days of exposure  
76 the bees were anesthetized on ice at 4°C. The brains were dissected in phosphate buffered saline  
77 (PBS) and immediately frozen in liquid nitrogen and stored at -80°C. Their ovaries were checked for  
78 development to ensure that only non-reproductive workers were used (Amarasinghe *et al.*, 2014;  
79 Harrison *et al.*, 2015).

### 80 **BS-seq**

#### 81 **Genomic DNA extraction, sequencing and mapping**

82 Six libraries were prepared (3 colonies, control and treatment). For each colony, 10 boxes were reared  
83 (5 control and 5 treatment). Each library was generated from 12 pooled brains of non-reproductive  
84 workers taken at random from the relevant boxes for a total of 72 brains. Genomic DNA was  
85 extracted, using QIAGEN QIAamp DNA Micro Kit following the manufacturer's instruction . The

---

## The epigenetic effects of neonicotinoids on bumblebees

86 concentration of genomic DNA was measured using a Qubit® dsDNA BR Assay Kit (ThermoFisher  
87 Scientific, USA) and Nanodrop. Sequencing was performed on a HiSeq 2000 machine (Illumina,  
88 Inc.) at the Beijing Genomics Institute (BGI), generating 100-bp paired-end reads.

89 Poor quality reads were removed using fastQC v0.11.2 (Andrews *et al.*, 2010) and adapters  
90 trimmed using cutadapt V1.11 (Martin, 2011) and trimmomatic V0.36 (Bolger *et al.*, 2014). Bismark  
91 v0.18.1 (Krueger and Andrews, 2011) was used to align the reads to the Bter\_1.0 genome (Refseq  
92 accession no. GCF\_000214255.1 (Sadd *et al.*, 2015)), remove PCR artifacts and extract methylation  
93 calls in CpG, CHH and CHG contexts (where H represents adenine, thymine or cytosine). The  
94 cytosine report files from Bismark and the *B. terrestris* annotation file (GCF\_000214255.1) were  
95 combined using the sqldf library (Grothendieck, 2017) in R v3.4.0 (core Team, 2016) to generate the  
96 distribution of methylated Cs over genomic features. Cytosines with less than 10X coverage were  
97 excluded. For each cytosine the proportion of methylation reads over total reads was calculated.

### 98 **Methylation differences between treatments**

99 Differential methylation analysis was performed using methylKit (Akalin *et al.*, 2012). Bismark  
100 cytosine reports were filtered to exclude loci with extreme low or high coverage (< 10 or > 500  
101 reads) and those not covered in all samples. A mixture of binomial model (Cheng and Zhu, 2014)  
102 was used to make per-loci methylation status calls and only loci identified as methylated in at least  
103 one sample were tested. A logistic regression test was applied using overdispersion correction,  
104 controlling for colony as a covariate, and adjusting p-values for multiple testing using the SLIM  
105 method. A minimum change in methylation between treatments of 10% was used to filter results.

---

## The epigenetic effects of neonicotinoids on bumblebees

### 106 **RNA-seq**

#### 107 **RNA extraction and Illumina sequencing**

108 Eighteen libraries were prepared (three colonies, three replicates per colony, two conditions). For  
109 each colony, 6 boxes were reared (3 control and 3 treatment). Each library was generated from 3  
110 pooled brains of non-reproductive workers taken from the relevant boxes, for a total of 54 brains.  
111 Total RNA was isolated utilizing the GenElute Mammalian Total RNA Miniprep Kit. DNA  
112 and RNAase activity was eliminated using (Sigma-Aldrich DNase I treatment kit) following the  
113 manufacturer's instruction. RNA concentration and integrity were determined by Bioanalyzer using  
114 the RNA Nano Kit (Agilent Technologies). From each sample we isolated an average of 0.8 mg of  
115 RNA. Two samples appeared degraded and were not used. Nine control and seven treated samples  
116 were prepared and sequenced on HiSeq 200 (Illumina, Inc.) at Beijing Genomics Institute (BGI)  
117 and 100-bp paired-end reads were generated.

118 BGI removed adaptor sequences, contamination and low-quality reads from raw data. Base  
119 calling and quality scoring of the raw reads were visualized using fastQC v 0.11.2 (Andrews, 2010).  
120 The clean reads for each sample were aligned to the reference genome *Bter\_1.0* genome (Refseq  
121 accession no. GCF\_000214255.1 (Sadd *et al.*, 2015)) using Hisat2 v2.0.4 (Kim *et al.*, 2015) with  
122 default parameters. The output sam file was sorted and converted to a bam file using samtools (Li  
123 *et al.*, 2009). Aligned reads were assembled and quantified using the assembler stringtie v1.3.3b  
124 (Pertea *et al.*, 2015).

#### 125 **Differential gene expression analysis**

126 A table of raw counts was generated using a Python script ([https://github.com/gpertea/](https://github.com/gpertea/stringtie/blob/master/prepDE)  
127 [stringtie/blob/master/prepDE](https://github.com/gpertea/stringtie/blob/master/prepDE)) and analysed using DESeq2 (Love *et al.*, 2014) in R v3.4.0

---

## The epigenetic effects of neonicotinoids on bumblebees

128 (core Team, 2016) to estimate differentially expressed genes using an FDR-adjusted p-value threshold  
129 of 0.05 and controlling for colony effects. Genes with less than 10 reads were discarded from  
130 analysis. The normalized read counts were  $\log_2$  transformed. The quality of replicates was assessed  
131 by plotting read counts of samples against one another and assessing the dispersion and presence of  
132 any artefacts between samples (Rich *et al.*, 2018). A principal-component analysis was performed  
133 to visualize diversity between samples within treatment and between condition.

### 134 **GO term enrichment and KEGG analysis**

135 A list of GO terms for the bumblebee were made by annotating the transcriptome using trinotate  
136 (default settings) (Hebert *et al.*, 2016) and blast2GO (against RefSeq) (Conesa *et al.*, 2005). These  
137 lists were combined, using the pipeline implemented in Amar *et al.* 2014 with a K value of 1. A  
138 hypergeometric test was applied and significant GO terms identified after BH correction (p corrected  
139  $< 0.05$ ) (Benjamini and Hochberg, 1995) using GOstats (Falcon and Gentleman, 2006), with all  
140 RNA features in the bumblebee genome used as a background (GCF\_000214255.1). We used  
141 REVIGO (Supek *et al.*, 2011) to visualise enriched GO terms, selecting the whole UniProt database  
142 and SimRel semantic similarity measure.

143 The clusterprofiler R package (version 3.8.1) (Yu *et al.*, 2012) identified genes from KEGG  
144 pathways using the whole UniProt database. A hypergeometric test was applied and significant  
145 KEGG pathways were identified after BH correction (qvalue  $< 0.05$ ) (Benjamini and Hochberg,  
146 1995).



## 147 **Results**

### 148 **Methylation analysis**

149 The overall sequence alignment rate was  $67.21\% \pm 1.53\%$  (mean  $\pm$  standard deviation). The  
150 proportion of methylated cytosine reads calculated by Bismark were  $0.53\% \pm 0.05\%$  for CpGs,  
151  $0.37\% \pm 0.05\%$  for CHGs,  $0.38\% \pm 0.07\%$  for CHHs and  $0.4\% \pm 0.06\%$  for CNs or CHNs ((H =  
152 A, C, or T). While insect methylation levels are often low (Glastad *et al.*, 2017) these methylation  
153 levels are lower even than in the honey bee, *Apis mellifera*, estimated at  $\sim 1\%$  at the genome level  
154 using similar metrics (Feng *et al.*, 2010; Bewick *et al.*, 2017). In a CpG context, across all samples,  
155  $0.15\% \pm 0.03\%$  of loci with a minimum coverage of 10 reads were considered methylated by the  
156 mixture of binomial model. The distribution of CpG methylation shows a mild bimodal distribution  
157 with the vast majority of sites being not or only modestly methylated and a few fully methylated  
158 (Figure S1 A). Methylated CpGs are more abundant in coding regions (seven fold) and exons (five  
159 fold) than introns (Figure 1 A). Non-CpG per-loci methylation levels were reported as less than  
160  $0.001\%$  by the mixture of binomial model. This, in conjunction with the uniformity of non-CpG  
161 methylation across genomic features (Figure 1 B,C), led to the conclusion that such levels were  
162 indistinguishable from error and as such were excluded from subsequent analysis.

### 163 **Methylation differences between control and neonicotinoid treated samples**

164 In total 4,424,986 loci were analysed using the mixture of binomial model, which subsequently  
165 identified 6,080 sites to test. No differentially methylated loci were identified using logistic  
166 regression at a q-value of 0.05 or 0.1. MethylKit includes an option to pool replicates into single  
167 control/treatment samples and use Fisher's exact test; using this approach we identified a small

## The epigenetic effects of neonicotinoids on bumblebees

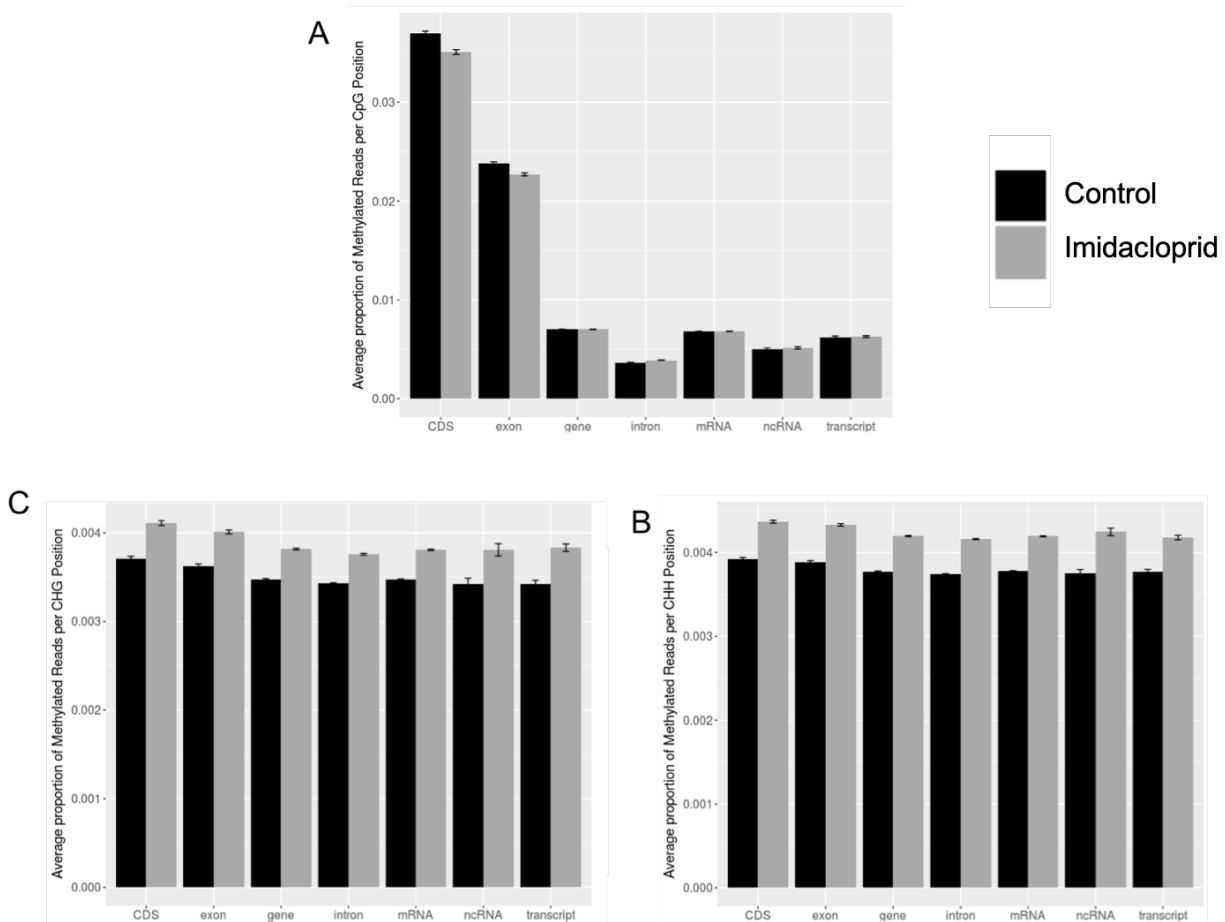

Figure 1: Methylated Cs distribution. Average proportion of methylation reads  $\pm$  SD per CpG (A), CHH (B) and CHG (C) positions over genomic features. Control samples in black and Neo treated samples in grey.

168 number of differentially methylated CpGs at q-value  $< 0.1$ , including loci within *histone-lysine*  
169 *N-methyltransferase 2C*, *histone acetyltransferase p300*, *CXXC1* (a transcriptional activator that  
170 binds to unmethylated CpGs), and genes involved with axon formation (supplementary data,  
171 *diff\_meth\_fisher*).

---

## The epigenetic effects of neonicotinoids on bumblebees

### 172 **Expression analysis**

173 Alignment rate to the genome was 93.6% (92.1 to 94.1) and after filtering a total of 10,772 genes  
174 were analysed. All libraries from the same treatment showed low variation in their gene expression  
175 patterns (Figure S2 , S3) .

### 176 **Differential expression**

177 A total of 405 genes were differentially expressed: 192 genes upregulated and 213 down-  
178 regulated in neonicotinoid samples compared to controls (see supplementary data: differen-  
179 tially\_expressed\_genes). Four cytochrome P450 (CYP) genes were differentially expressed, two  
180 upregulated and two downregulated. Upregulated genes in neonicotinoid treated bees also in-  
181 clude *apyrase* that hydrolyzes ATP to AMP, the neuropeptide receptor *pyrokinin-1 receptor* and  
182 *ionotropic receptor 25a* that is involved in circadian clock resetting in *Drosophila* (Chen *et al.*,  
183 2015). Downregulated genes include *neurexin*, involved in synaptic formation and maintenance,  
184 *peptide methionine sulfoxide reductase*, involved in repair of oxidation-damaged proteins, and a  
185 number of genes related to photoreceptor function. Three genes belonging to the homeotic box  
186 gene (Hox) family were downregulated in neonicotinoid treated bees. *lethal(2)essential for life*  
187 (*Efl21*) displayed the highest down regulation. We found 228 enriched GO terms (BH corrected  $p <$   
188 0.05) associated with differential gene expression (supplementary data: expression\_GO and Figure  
189 S4). Many of the most significantly enriched terms were associated with energy reserve metabolism.  
190 Also enriched were terms associated with synaptic transmission, apoptotic processes, xenobiotic  
191 transport and complement activation. No KEGG pathways were over represented for differentially  
192 expressed genes ( $q < 0.05$ ).

## The epigenetic effects of neonicotinoids on bumblebees

### 193 DNA methylation - Expression correlation

194 We calculated the average percentage of methylated reads per gene for the most differentially  
195 expressed genes ( $\log_2$  fold-change  $> 0.5$  or  $< -0.5$ ) and non-differentially expressed genes (Figure 2),  
196 fitting a generalized linear model (GLM) with a quasi binomial error distribution with treatment  
197 (control vs neonicotinoid) and expression state (DEG vs. non-DEG) as independent variables. There  
198 was no significant interactions between the independent variables (interaction model versus main  
199 effects only model:  $\chi^2 = -0.014$ , d.f. = 1,  $p = 0.82$ ; ). For CpGs, non-differentially expressed genes  
200 had more methylation than differentially expressed genes ( $z_{1,19673}=4.641$ ,  $p<0.001$ ). There was no  
201 significant treatment effect on methylation levels ( $z_{1,19673}=-0.772$ ,  $p=0.692$ ). .

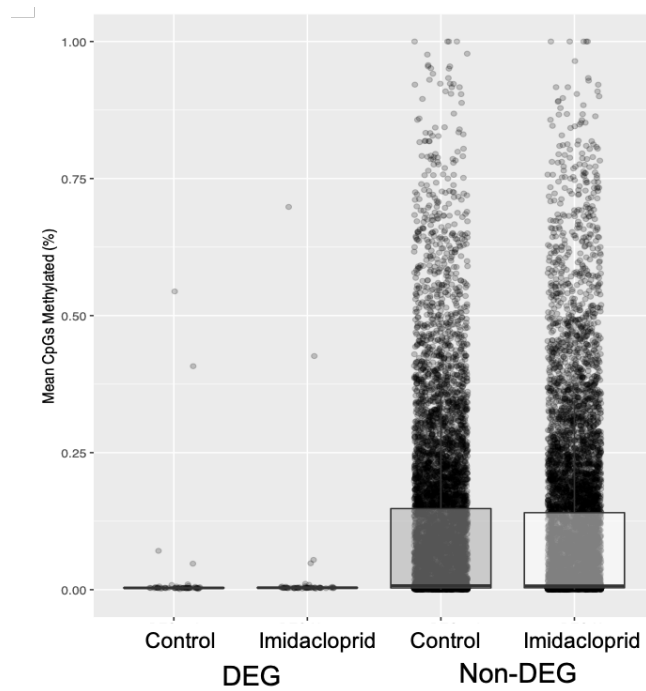

Figure 2: Average percentage of methylated CpG per gene. Differentially expressed genes (DEG) and non differentially expressed genes (nonDEG) are plotted separately. Dots represent genes.

202 To have a more fine scale understanding of the correlation between methylation and expression,

## The epigenetic effects of neonicotinoids on bumblebees

203 we plotted mean proportion of methylation per gene against ranked expression level ( $\log_{10}$ fpkm per  
204 gene) in 100 bins (from low to high) (Figure 3) fitting a linear model with treatment and expression  
205 level as independent variables. There was no significant interaction between expression's and  
206 treatment's effects on methylation (interaction model versus main effects only model:  $F_{1,189} =$   
207  $1.0347$ ,  $p = 0.3104$ , ). We found a significant effect of expression on methylation ( $F_{1,189} = 281.654$ ,  
208  $p = < 2 \times 10^{-16}$  ). Neonicotinoid treated bees had comparable levels of CpG methylation to control  
209 bees ( $F_{1,189} = 1.8125$ ,  $p = 0.1798$ ).

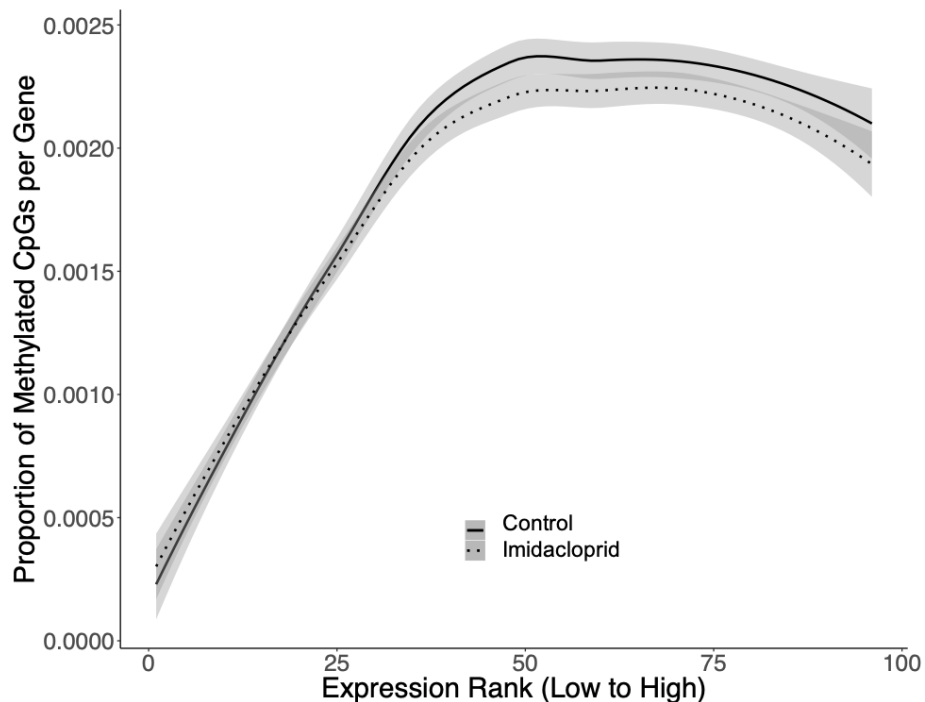

Figure 3: The proportion of methylated CpGs is plotted against gene expression rank. One hundred "bins" of progressively increasing level of expression were generated and genes with similar level of expression have been grouped in the same bin. Solid lines represent control samples and dotted lines neonicotinoid treated samples. The grey shading represents 95% confidence intervals.

## 210 Discussion

211 We found numerous genes which show differential expression between bees treated with field  
212 realistic doses of the neonicotinoid imidacloprid and control bees. We found CpG methylation to be  
213 focused in exons, and high CpG methylation was associated with highly expressed genes, but no  
214 differentially methylated loci were detected between treatments. Non-differentially expressed genes  
215 had higher methylation levels than differentially expressed genes.

216 Four cytochrome P450 (CYP) genes were identified as differentially expressed, in line with  
217 other studies assessing the impact of insecticides on honeybees (Shi *et al.*, 2017; Li *et al.*, 2017;  
218 Derecka *et al.*, 2013; Wu *et al.*, 2017; Christen *et al.*, 2018). Two were upregulated (CYP6k1  
219 and 4c3) and two downregulated (28d1 and 9e2). CYP6, 9 and 28 genes are linked to xenobiotic  
220 metabolism and resistance to insecticides (Feyereisen, 2006) and CYP6 genes specifically have been  
221 found to be upregulated in honeybees after treatment with sublethal doses of the neonicotinoid  
222 Thiamethoxam (Shi *et al.*, 2017), as has CYP4C1 after treatment with the neonicotinoid Clothianidin  
223 (Christen *et al.*, 2018). The CYP9Q subfamily were recently shown to be responsible for bee  
224 sensitivity to neonicotinoids (Manjon *et al.*, 2018).

225 The preponderance of differentially expressed genes associated with synaptic transmission is  
226 to be expected, given that we used brain tissue and given the known target effects of neonicotinoids.  
227 The identification of a downregulated *neurexin* gene aligns with the results of Shi *et al.* (2017). The  
228 effects seen here on metabolic pathways has also been found in honeybees, with GO term enrichment  
229 for catabolic carbohydrate and lipid metabolism (Christen *et al.*, 2018). These authors suggested  
230 that due to the intensive energy demands of the brain, negative effects on metabolic pathways could  
231 affect brain function and therefore behaviour. *Efl21*, the most downregulated gene identified, has  
232 been found to be involved in foraging behaviour in bees (Hernández *et al.*, 2012). Downregulation

## The epigenetic effects of neonicotinoids on bumblebees

---

233 of carbohydrate metabolism pathways has also been shown in honeybee larvae (Derecka *et al.*, 2013;  
234 Wu *et al.*, 2017). Also downregulated were three hox genes. This may be indicative of an impaired  
235 immune system, as hox genes have been found to play a role in invertebrate innate immune responses  
236 (Uvell and Engström, 2007; Irazoqui *et al.*, 2008). Hox genes have been found to be downregulated  
237 in response to insecticide treatment in honeybees (Aufauvre *et al.*, 2014). The bumblebee visual  
238 system may also be impacted by imidacloprid treatment, given the downregulation of genes such as  
239 protein scarlet, protein glass and ninaC.

240 No differentially methylated loci between control and treatment were identified using a logistic  
241 regression model, and we suggest that if acute neonicotinoid exposure does alter methylation status  
242 in *B. terrestris* it is subtle and the data reported here may be underpowered to detect it due to low  
243 per-sample coverage. A small number of differentially methylated loci were identified by pooling  
244 replicates and using Fisher's exact test (supplementary data: diff\_meth\_fisher), but unlike logistic  
245 regression this approach cannot control for covariates and the results should be treated with caution.  
246 Using this approach a CpG loci in *CXXC-type zinc finger protein 1* was identified as hypermethylated  
247 in neonicotinoid-treated bees; this gene also was upregulated in that group. In mammals, CXXC1 is  
248 a transcriptional activator that binds to unmethylated CpGs to regulate gene expression (Shin Voo  
249 *et al.*, 2000). Other loci identified by pooling were located within *histone acetyltransferase p300* and  
250 *histone-lysine N-methyltransferase 2C*. These findings raise the possibility that neonicotinoids may  
251 have a more detectable effect on methylation and subsequent gene expression over a longer period  
252 through a cascade of epigenetic processes. A study on the effects of imidacloprid on bumblebees  
253 found no effect on mortality or reproduction over 11 weeks using 10 ppb when workers were not  
254 required to forage for food, while 20 ppb affected mortality and foraging was impaired at both doses  
255 (Mommaerts *et al.*, 2009). It may therefore be that a higher dose or longer exposure time might have  
256 a detectable impact on CpG methylation, and further work investigating chronic rather than acute

## The epigenetic effects of neonicotinoids on bumblebees

---

257 exposure to imidacloprid at different doses would be valuable. Also worthy of investigation is the  
258 potential effect on epigenetic processes other than DNA methylation, such as histone modification,  
259 which has been found to have a similar, but non-redundant, association with gene expression in the  
260 ant *Camponotus floridanus* (Glastad *et al.*, 2015).

261 We found patterns of CpG methylation to be in line with other insect species. It is mainly  
262 focused in exons (Glastad *et al.*, 2017), and high CpG methylation was associated with highly  
263 expressed genes (Figure 3) (Arsenault *et al.*, 2018; Bonasio *et al.*, 2012; Glastad *et al.*, 2013;  
264 Libbrecht *et al.*, 2016; Patalano *et al.*, 2015; Wang *et al.*, 2013), and non-differentially expressed  
265 genes showed higher levels of methylation (Glastad *et al.*, 2013, 2016; Libbrecht *et al.*, 2016; Sarda  
266 *et al.*, 2012). Neonicotinoids appear to have no effect on overall levels of CpG methylation (see  
267 Figures 2 and 3).

268 Non-CpG methylation plays a role in gene silencing in flowering plants (Stroud *et al.*, 2014)  
269 and to a lesser extent, in mammals (Dyachenko *et al.*, 2010). Wang *et al.* 2013 stated that the jewel  
270 wasp's (*Nasonia*) genome lacked non-CpG DNA methylation, and in this study, while we identified  
271 a very small number of loci showing methylation in CHG/CHH contexts, we could not exclude the  
272 possibility that much of it was noise, as bisulfite sequencing is prone to false positives from sources  
273 such as incomplete bisulfite conversion, miscalled bases and SNPs. Overall, we conclude that there  
274 is no notable methylation of non-CpG cytosines in *B. terrestris*, as with *Nasonia* and the honeybee  
275 (Lyko *et al.*, 2010) In contrast to the preponderance of CpG methylation in exons, we found that  
276 CHH and CHG methylation was uniformly spread throughout genes (Figure 1) a pattern which  
277 would be consistent with the idea that there is no significant methylation in these contexts.

278 Recently, it has become clear that epigenetics can play a role in the interplay between  
279 man-made chemicals and natural ecosystems, and their constituent species (Vandegheuchte and  
280 Janssen, 2014). Hymenopteran insects (ants, bees and wasps) are ideal models to study this. They are



---

## The epigenetic effects of neonicotinoids on bumblebees

281 both strongly affected by man-made chemicals and are important emerging models for epigenetics  
282 (Glastad *et al.*, 2011; Weiner and Toth, 2012; Welch and Lister, 2014; Yan *et al.*, 2014). However,  
283 on the evidence of this study, imidacloprid does not appear to have epigenetic effects. This finding  
284 is important in the context of future legislation for pesticide control, as it is evidence suggesting a  
285 potential lack of transgenerational effects on *B. terrestris* with the use of imidacloprid.

### 286 **Acknowledgements**

287 Thanks to Dr. Swidbert Ott and Prof. Dave Goulson for discussions. EBM, BJH and MP were  
288 funded by NERC grant NE/N010019/1. PSAB was supported by a scholarship from the Human  
289 Capacity Development Program (Koya University - Iraq). HM was supported by a NERC CENTA  
290 DTP studentship. ARCJ was supported by a BBSRC MIBTP DTP studentship.

### 291 **Data accessibility**

292 All sequencing data related to this project can be found under NCBI BioProject PRJNA524132.

### 293 **Authors' contributions**

294 EBM, ER and PSAB designed the study. PSAB carried out the experiments. PSAB, BJH, MP,  
295 ARCJ and HM analysed the data. MP, PSAB and EBM wrote the initial draft. All authors were  
296 involved in redrafting.

297 **Supplementary material**

298 Supplementary figures are available in the supplementary figures file. Supplementary data is

299 available at <https://doi.org/10.6084/m9.figshare.6796802.v5>.

## 300 **References**

- 301 Akalin, A., Melnick, A., Mason, C. E., Garrett-Bakelman, F. E., Figueroa, M. E., Kormaksson,  
302 M., and Li, S. 2012. methylkit: a comprehensive r package for the analysis of genome-wide dna  
303 methylation profiles. *Genome biology*, 13(10): R87.
- 304 Amar, D., Frades, I., Danek, A., Goldberg, T., Sharma, S. K., Hedley, P. E., Proux-Wera, E.,  
305 Andreasson, E., Shamir, R., Tzfadia, O., *et al.* 2014. Evaluation and integration of functional  
306 annotation pipelines for newly sequenced organisms: the potato genome as a test case. *BMC plant*  
307 *biology*, 14(1): 329.
- 308 Amarasinghe, H. E., Clayton, C. I., and Mallon, E. B. 2014. Methylation and worker reproduction in  
309 the bumble-bee (*bombus terrestris*). In *Proc. R. Soc. B*, volume 281, page 20132502. The Royal  
310 Society.
- 311 Andrews, S. *et al.* 2010. Fastqc: a quality control tool for high throughput sequence data.
- 312 Arsenault, S. V., Hunt, B. G., and Rehan, S. M. 2018. The effect of maternal care on gene expression  
313 and DNA methylation in a subsocial bee. *Nature Communications*, 9(1).
- 314 Aufauvre, J., Misme-Aucouturier, B., Viguès, B., Texier, C., Delbac, F., and Blot, N. 2014.  
315 Transcriptome Analyses of the Honeybee Response to *Nosema ceranae* and Insecticides. *PLOS*  
316 *ONE*, 9(3): e91686.
- 317 Benjamini, Y. and Hochberg, Y. 1995. Controlling the false discovery rate: a practical and powerful  
318 approach to multiple testing. *Journal of the royal statistical society. Series B (Methodological)*,  
319 pages 289–300.
- 320 Bewick, A. J., Vogel, K. J., Moore, A. J., and Schmitz, R. J. 2017. Evolution of dna methylation  
321 across insects. *Molecular biology and evolution*, 34(3): 654–665.
- 322 Biergans, S. D., Jones, J. C., Treiber, N., Galizia, C. G., and Szyszka, P. 2012. DNA Methylation  
323 Mediates the Discriminatory Power of Associative Long-Term Memory in Honeybees. *PLoS*  
324 *ONE*, 7(6): e39349.
- 325 Blacquièrè, T., Smaghe, G., van Gestel, C. A. M., and Mommaerts, V. 2012. Neonicotinoids  
326 in bees: a review on concentrations, side-effects and risk assessment. *Ecotoxicology*, 21(4):  
327 973–992.
- 328 Bolger, A. M., Lohse, M., and Usadel, B. 2014. Trimmomatic: a flexible trimmer for illumina  
329 sequence data. *Bioinformatics*, 30(15): 2114–2120.

---

The epigenetic effects of neonicotinoids on bumblebees

---

- 330 Bonasio, R., Li, Q., Lian, J., Mutti, N. S., Jin, L., Zhao, H., Zhang, P., Wen, P., Xiang, H., Ding,  
331 Y., Jin, Z., Shen, S. S., Wang, Z., Wang, W., Wang, J., Berger, S. L., Liebig, J., Zhang, G., and  
332 Reinberg, D. 2012. Genome-wide and Caste-Specific DNA Methylomes of the Ants *Camponotus*  
333 *floridanus* and *Harpegnathos saltator*. *Current Biology*, 22(19): 1755–1764.
- 334 Botias, C., David, A., Horwood, J., Abdul-Sada, A., Nicholls, E., Hill, E., and Goulson, D.  
335 2015. Neonicotinoid Residues in Wildflowers, a Potential Route of Chronic Exposure for Bees.  
336 *Environmental Science & Technology*, 49(21): 12731–12740.
- 337 Chaimanee, V., Evans, J. D., Chen, Y., Jackson, C., and Pettis, J. S. 2016. Sperm viability and  
338 gene expression in honey bee queens (*Apis mellifera*) following exposure to the neonicotinoid  
339 insecticide imidacloprid and the organophosphate acaricide coumaphos. *Journal of Insect*  
340 *Physiology*, 89: 1–8.
- 341 Chen, C., Buhl, E., Xu, M., Croset, V., Rees, J. S., Lilley, K. S., Benton, R., Hodge, J. J. L., and  
342 Stanewsky, R. 2015. *Drosophila* Ionotropic Receptor 25a mediates circadian clock resetting by  
343 temperature. *Nature*, 527(7579): 516–520.
- 344 Christen, V., Mittner, F., and Fent, K. 2016. Molecular Effects of Neonicotinoids in Honey Bees  
345 (*Apis mellifera*). *Environmental Science & Technology*, 50(7): 4071–4081.
- 346 Christen, V., Schirrmann, M., Frey, J. E., and Fent, K. 2018. Global Transcriptomic Effects of  
347 Environmentally Relevant Concentrations of the Neonicotinoids Clothianidin, Imidacloprid, and  
348 Thiamethoxam in the Brain of Honey Bees (*Apis mellifera*). *Environmental Science & Technology*.
- 349 Conesa, A., Götz, S., García-Gómez, J. M., Terol, J., Talón, M., and Robles, M. 2005. Blast2go:  
350 a universal tool for annotation, visualization and analysis in functional genomics research.  
351 *Bioinformatics*, 21(18): 3674–3676.
- 352 core Team, R. 2016. R: A language and environment for statistical computing.
- 353 Cresswell, J. E. 2011. A meta-analysis of experiments testing the effects of a neonicotinoid  
354 insecticide (imidacloprid) on honey bees. *Ecotoxicology*, 20(1): 149–157.
- 355 David, A., Botías, C., Abdul-Sada, A., Nicholls, E., Rotheray, E. L., Hill, E. M., and Goulson, D.  
356 2016. Widespread contamination of wildflower and bee-collected pollen with complex mixtures  
357 of neonicotinoids and fungicides commonly applied to crops. *Environment International*, 88:  
358 169–178.
- 359 Derecka, K., Blythe, M. J., Malla, S., Genereux, D. P., Guffanti, A., Pavan, P., Moles, A., Snart, C.,  
360 Ryder, T., Ortori, C. A., Barrett, D. A., Schuster, E., and Stöger, R. 2013. Transient Exposure to  
361 Low Levels of Insecticide Affects Metabolic Networks of Honeybee Larvae. *PLOS ONE*, 8(7):  
362 e68191.

---

The epigenetic effects of neonicotinoids on bumblebees

---

- 363 Dyachenko, O. V., Schevchuk, T. V., Kretzner, L., Buryanov, Y. I., and Smith, S. S. 2010. Human  
364 non-CG methylation. *Epigenetics*, 5(7): 569–572.
- 365 Elango, N., Hunt, B. G., Goodisman, M. A. D., and Yi, S. V. 2009. DNA methylation is widespread  
366 and associated with differential gene expression in castes of the honeybee, *Apis mellifera*.  
367 *Proceedings of the National Academy of Sciences*, 106(27): 11206–11211.
- 368 Falcon, S. and Gentleman, R. 2006. Using *gostats* to test gene lists for go term association.  
369 *Bioinformatics*, 23(2): 257–258.
- 370 Feng, S., Cokus, S. J., Zhang, X., Chen, P.-Y., Bostick, M., Goll, M. G., Hetzel, J., Jain, J., Strauss,  
371 S. H., Halpern, M. E., *et al.* 2010. Conservation and divergence of methylation patterning in  
372 plants and animals. *Proceedings of the National Academy of Sciences*, 107(19): 8689–8694.
- 373 Feyereisen, R. 2006. Evolution of insect P450. *Biochemical Society Transactions*, 34(6): 1252–1255.
- 374 Foret, S., Kucharski, R., Pittelkow, Y., Lockett, G. A., and Maleszka, R. 2009. Epigenetic regulation  
375 of the honey bee transcriptome: unravelling the nature of methylated genes. *BMC Genomics*,  
376 10(1): 472.
- 377 Foret, S., Kucharski, R., Pellegrini, M., Feng, S., Jacobsen, S. E., Robinson, G. E., and Maleszka, R.  
378 2012. DNA methylation dynamics, metabolic fluxes, gene splicing, and alternative phenotypes in  
379 honey bees. *Proceedings of the National Academy of Sciences*, 109(13): 4968–4973.
- 380 Glastad, K. M., Hunt, B. G., Yi, S. V., and Goodisman, M. a. D. 2011. DNA methylation in insects:  
381 on the brink of the epigenomic era. *Insect Molecular Biology*, 20(5): 553–565.
- 382 Glastad, K. M., Hunt, B. G., and Goodisman, M. a. D. 2013. Evidence of a conserved functional  
383 role for DNA methylation in termites. *Insect Molecular Biology*, 22(2): 143–154.
- 384 Glastad, K. M., Hunt, B. G., and Goodisman, M. A. D. 2015. DNA methylation and chromatin  
385 organization in insects: insights from the ant *Camponotus floridanus*. *Genome Biology and*  
386 *Evolution*, page evv039.
- 387 Glastad, K. M., Gokhale, K., Liebig, J., and Goodisman, M. A. D. 2016. The caste- and sex-specific  
388 DNA methylome of the termite *Zootermopsis nevadensis*. *Scientific Reports*, 6: 37110.
- 389 Glastad, K. M., Arsenault, S. V., Vertacnik, K. L., Geib, S. M., Kay, S., Danforth, B. N., Rehan,  
390 S. M., Linnen, C. R., Kocher, S. D., and Hunt, B. G. 2017. Variation in DNA Methylation Is  
391 Not Consistently Reflected by Sociality in Hymenoptera. *Genome Biology and Evolution*, 9(6):  
392 1687–1698.
- 393 Goldberg, A., Allis, C., and Bernstein, E. 2007. Epigenetics: A Landscape Takes Shape. *Cell*,  
394 128(4): 635–638.

---

The epigenetic effects of neonicotinoids on bumblebees

---

- 395 Grothendieck, G. 2017. *squidf: Manipulate R Data Frames Using SQL*. R package version 0.4-11.
- 396 Harrison, M. C., Hammond, R. L., and Mallon, E. B. 2015. Reproductive workers show queen-like  
397 gene expression in an intermediately eusocial insect, the buff-tailed bumble bee *Bombus terrestris*.  
398 *Molecular Ecology*, 24: 121–129.
- 399 Head, J. A. 2014. Patterns of DNA methylation in animals: an ecotoxicological perspective.  
400 *Integrative and Comparative Biology*, 54(1): 77–86.
- 401 Hebert, F. O., Grambauer, S., Barber, I., Landry, C. R., and Aubin-Horth, N. 2016. Transcrip-  
402 tome sequences spanning key developmental states as a resource for the study of the cestode  
403 *Schistocephalus solidus*, a threespine stickleback parasite. *GigaScience*, 5.
- 404 Hernández, L. G., Lu, B., da Cruz, G. C. N., Calábria, L. K., Martins, N. F., Togawa, R., Espindola,  
405 F. S., Yates, J. R., Cunha, R. B., and de Sousa, M. V. 2012. The worker honeybee brain proteome.  
406 *Journal of Proteome Research*, 11(3): 1485–1493.
- 407 Irazoqui, J. E., Ng, A., Xavier, R. J., and Ausubel, F. M. 2008. Role for  $\beta$ -catenin and HOX tran-  
408 scription factors in *Caenorhabditis elegans* and mammalian host epithelial-pathogen interactions.  
409 *Proceedings of the National Academy of Sciences*, 105(45): 17469–17474.
- 410 Kim, D., Langmead, B., and Salzberg, S. L. 2015. HISAT: a fast spliced aligner with low memory  
411 requirements. *Nature Methods*, 12(4): 357–360.
- 412 Krueger, F. and Andrews, S. R. 2011. Bismark: a flexible aligner and methylation caller for  
413 bisulfite-seq applications. *bioinformatics*, 27(11): 1571–1572.
- 414 Kucharski, R., Maleszka, J., Foret, S., and Maleszka, R. 2008. Nutritional control of reproductive  
415 status in honeybees via DNA methylation. *Science*, 319: 1827–1830. 5871.
- 416 Li, H., Handsaker, B., Wysoker, A., Fennell, T., Ruan, J., Homer, N., Marth, G., Abecasis, G., Durbin,  
417 R., and 1000 Genome Project Data Processing Subgroup 2009. The Sequence Alignment/Map  
418 format and SAMtools. *Bioinformatics (Oxford, England)*, 25(16): 2078–2079.
- 419 Li, Z., Li, M., He, J., Zhao, X., Chaimanee, V., Huang, W.-F., Nie, H., Zhao, Y., and Su, S. 2017.  
420 Differential physiological effects of neonicotinoid insecticides on honey bees: A comparison  
421 between *Apis mellifera* and *Apis cerana*. *Pesticide Biochemistry and Physiology*, 140: 1–8.
- 422 Li-Byarlay, H., Li, Y., Stroud, H., Feng, S., Newman, T. C., Kaneda, M., Hou, K. K., Worley,  
423 K. C., Elsiik, C. G., Wickline, S. A., Jacobsen, S. E., Ma, J., and Robinson, G. E. 2013. RNA  
424 interference knockdown of DNA methyl-transferase 3 affects gene alternative splicing in the  
425 honey bee. *Proceedings of the National Academy of Sciences*, 110(31): 12750–12755.

---

The epigenetic effects of neonicotinoids on bumblebees

---

- 426 Libbrecht, R., Oxley, P. R., Keller, L., and Kronauer, D. J. C. 2016. Robust DNA Methylation in the  
427 Clonal Raider Ant Brain. *Current Biology*, 0(0).
- 428 Love, M. I., Huber, W., and Anders, S. 2014. Moderated estimation of fold change and dispersion  
429 for rna-seq data with deseq2. *Genome biology*, 15(12): 550.
- 430 Lyko, F., Foret, S., Kucharski, R., Wolf, S., Falckenhayn, C., and Maleszka, R. 2010. The Honey  
431 Bee Epigenomes: Differential Methylation of Brain DNA in Queens and Workers. *PLoS Biol*,  
432 8(11): e1000506.
- 433 Manjon, C., Troczka, B. J., Zaworra, M., Beadle, K., Randall, E., Hertlein, G., Singh, K. S.,  
434 Zimmer, C. T., Homem, R. A., Lueke, B., Reid, R., Kor, L., Kohler, M., Benting, J., Williamson,  
435 M. S., Davies, T. G. E., Field, L. M., Bass, C., and Nauen, R. 2018. Unravelling the Molecular  
436 Determinants of Bee Sensitivity to Neonicotinoid Insecticides. *Current Biology*, 28(7): 1137–  
437 1143.e5.
- 438 Marshall, H., Lonsdale, Z. N., and Mallon, E. B. 2019. Methylation and Gene Expression Differences  
439 Between Reproductive Castes of Bumblebee Workers. *bioRxiv*, page 517698.
- 440 Martin, M. 2011. Cutadapt removes adapter sequences from highthroughput sequencing reads.  
441 *embnet. journal* 17: 10–12.
- 442 Mommaerts, V., Reynders, S., Boulet, J., Besard, L., Sterk, G., and Smagghe, G. 2009. Risk  
443 assessment for side-effects of neonicotinoids against bumblebees with and without impairing  
444 foraging behavior. *Ecotoxicology*, 19(1): 207.
- 445 Patalano, S., Vlasova, A., Wyatt, C., Ewels, P., Camara, F., Ferreira, P. G., Asher, C. L., Jurkowski,  
446 T. P., Segonds-Pichon, A., Bachman, M., González-Navarrete, I., Minoche, A. E., Krueger, F.,  
447 Lowy, E., Marcet-Houben, M., Rodriguez-Ales, J. L., Nascimento, F. S., Balasubramanian, S.,  
448 Gabaldon, T., Tarver, J. E., Andrews, S., Himmelbauer, H., Hughes, W. O. H., Guigó, R., Reik, W.,  
449 and Sumner, S. 2015. Molecular signatures of plastic phenotypes in two eusocial insect species  
450 with simple societies. *Proceedings of the National Academy of Sciences*, 112(45): 13970–13975.
- 451 Pegoraro, M., Marshall, H., Lonsdale, Z. N., and Mallon, E. B. 2017. Do social insects support  
452 Haig’s kin theory for the evolution of genomic imprinting? *Epigenetics*, 12(9): 725–742.
- 453 Pertea, M., Pertea, G. M., Antonescu, C. M., Chang, T.-C., Mendell, J. T., and Salzberg, S. L.  
454 2015. StringTie enables improved reconstruction of a transcriptome from RNA-seq reads. *Nature*  
455 *Biotechnology*, 33(3): 290–295.
- 456 Pisa, L. W., Amaral-Rogers, V., Belzunces, L. P., Bonmatin, J. M., Downs, C. A., Goulson, D.,  
457 Kreutzweiser, D. P., Krupke, C., Liess, M., McField, M., Morrissey, C. A., Noome, D. A., Settele,  
458 J., Simon-Delso, N., Stark, J. D., Sluijs, J. P. V. d., Dyck, H. V., and Wiemers, M. 2015. Effects of

---

The epigenetic effects of neonicotinoids on bumblebees

---

- 459 neonicotinoids and fipronil on non-target invertebrates. *Environmental Science and Pollution*  
460 *Research*, 22(1): 68–102.
- 461 Rehan, S. M., Glastad, K. M., Lawson, S. P., and Hunt, B. G. 2016. The Genome and Methylome  
462 of a Subsocial Small Carpenter Bee, *Ceratina calcarata*. *Genome Biology and Evolution*, 8(5):  
463 1401–1410.
- 464 Rich, C., Reitz, M., Eichmann, R., Hermann, S., Jenkins, D. J., Kogel, K.-H., Esteban, E., Ott,  
465 S., and Schafer, P. 2018. Cell type identity determines transcriptomic immune responses in  
466 *Arabidopsis thaliana* roots. *bioRxiv*, page 302448.
- 467 Rundlof, M., Andersson, G. K. S., Bommarco, R., Fries, I., Hederstrom, V., Herbertsson, L., Jonsson,  
468 O., Klatt, B. K., Pedersen, T. R., Yourstone, J., and Smith, H. G. 2015. Seed coating with a  
469 neonicotinoid insecticide negatively affects wild bees. *Nature*, 521(7550): 77–80.
- 470 Sadd, B. M., Barribeau, S. M., Bloch, G., Graaf, D. C. d., Dearden, P., Elsik, C. G., Gadau, J.,  
471 Grimmelikhuijzen, C. J., Hasselmann, M., Lozier, J. D., Robertson, H. M., Smagge, G., Stolle,  
472 E., Vaerenbergh, M. V., Waterhouse, R. M., Bornberg-Bauer, E., Klasberg, S., Bennett, A. K.,  
473 Câmara, F., Guigó, R., Hoff, K., Mariotti, M., Munoz-Torres, M., Murphy, T., Santesmasses,  
474 D., Amdam, G. V., Beckers, M., Beye, M., Biewer, M., Bitondi, M. M., Blaxter, M. L., Bourke,  
475 A. F., Brown, M. J., Buechel, S. D., Cameron, R., Cappelle, K., Carolan, J. C., Christiaens,  
476 O., Ciborowski, K. L., Clarke, D. F., Colgan, T. J., Collins, D. H., Cridge, A. G., Dalmay, T.,  
477 Dreier, S., Plessis, L. d., Duncan, E., Erler, S., Evans, J., Falcon, T., Flores, K., Freitas, F. C.,  
478 Fuchikawa, T., Gempe, T., Hartfelder, K., Hauser, F., Helbing, S., Humann, F. C., Irvine, F.,  
479 Jermiin, L. S., Johnson, C. E., Johnson, R. M., Jones, A. K., Kadowaki, T., Kidner, J. H., Koch,  
480 V., Köhler, A., Kraus, F. B., Lattorff, H. M., Leask, M., Lockett, G. A., Mallon, E. B., Antonio,  
481 D. S. M., Marxer, M., Meeus, I., Moritz, R. F., Nair, A., Näpflin, K., Nissen, I., Niu, J., Nunes,  
482 F. M., Oakeshott, J. G., Osborne, A., Otte, M., Pinheiro, D. G., Rossié, N., Rueppell, O., Santos,  
483 C. G., Schmid-Hempel, R., Schmitt, B. D., Schulte, C., Simões, Z. L., Soares, M. P., Swevers,  
484 L., Winnebeck, E. C., Wolschin, F., Yu, N., Zdobnov, E. M., Aqrawi, P. K., Blankenburg, K. P.,  
485 Coyle, M., Francisco, L., Hernandez, A. G., Holder, M., Hudson, M. E., Jackson, L., Jayaseelan,  
486 J., Joshi, V., Kovar, C., Lee, S. L., Mata, R., Mathew, T., Newsham, I. F., Ngo, R., Okwuonu, G.,  
487 Pham, C., Pu, L.-L., Saada, N., Santibanez, J., Simmons, D., Thornton, R., Venkat, A., Walden,  
488 K. K., Wu, Y.-Q., Debyser, G., Devreese, B., Asher, C., Blommaert, J., Chipman, A. D., Chittka,  
489 L., Fouks, B., Liu, J., O'Neill, M. P., Sumner, S., Puiu, D., Qu, J., Salzberg, S. L., Scherer, S. E.,  
490 Muzny, D. M., Richards, S., Robinson, G. E., Gibbs, R. A., Schmid-Hempel, P., and Worley, K. C.  
491 2015. The genomes of two key bumblebee species with primitive eusocial organization. *Genome*  
492 *Biology*, 16(1): 76.
- 493 Sarda, S., Zeng, J., Hunt, B. G., and Yi, S. V. 2012. The Evolution of Invertebrate Gene Body  
494 Methylation. *Molecular Biology and Evolution*, 29(8): 1907–1916.



---

The epigenetic effects of neonicotinoids on bumblebees

---

- 495 Shi, T.-F., Wang, Y.-F., Liu, F., Qi, L., and Yu, L.-S. 2017. Sublethal Effects of the Neonicotinoid  
496 Insecticide Thiamethoxam on the Transcriptome of the Honey Bees (Hymenoptera: Apidae).  
497 *Journal of Economic Entomology*, 110(6): 2283–2289.
- 498 Shin Voo, K., Carlone, D. L., Jacobsen, B. M., Flodin, A., and Skalnik, D. G. 2000. Cloning of a  
499 Mammalian Transcriptional Activator That Binds Unmethylated CpG Motifs and Shares a CXXC  
500 Domain with DNA Methyltransferase, Human Trithorax, and Methyl-CpG Binding Domain  
501 Protein 1. *Molecular and Cellular Biology*, 20(6): 2108–2121.
- 502 Standage, D. S., Berens, A. J., Glastad, K. M., Severin, A. J., Brendel, V. P., and Toth, A. L. 2016.  
503 Genome, transcriptome and methylome sequencing of a primitively eusocial wasp reveal a greatly  
504 reduced DNA methylation system in a social insect. *Molecular Ecology*, 25(8): 1769–1784.
- 505 Stanley, D. A., Smith, K. E., and Raine, N. E. 2015. Bumblebee learning and memory is impaired  
506 by chronic exposure to a neonicotinoid pesticide. *Scientific Reports*, 5: 16508.
- 507 Stroud, H., Do, T., Du, J., Zhong, X., Feng, S., Johnson, L., Patel, D. J., and Jacobsen, S. E. 2014.  
508 The roles of non-CG methylation in Arabidopsis. *Nature structural & molecular biology*, 21(1):  
509 64–72.
- 510 Supek, F., Bošnjak, M., Škunca, N., and Šmuc, T. 2011. Revigo summarizes and visualizes long  
511 lists of gene ontology terms. *PloS one*, 6(7): e21800.
- 512 Uvell, H. and Engström, Y. 2007. A multilayered defense against infection: combinatorial control  
513 of insect immune genes. *Trends in Genetics*, 23(7): 342–349.
- 514 Vandegehuchte, M. B. and Janssen, C. R. 2014. Epigenetics in an ecotoxicological context. *Mutation  
515 Research/Genetic Toxicology and Environmental Mutagenesis*, 764–765: 36–45.
- 516 Wang, X., Wheeler, D., Avery, A., Rago, A., Choi, J.-H., Colbourne, J. K., Clark, A. G., and Werren,  
517 J. H. 2013. Function and Evolution of DNA Methylation in *Nasonia vitripennis*. *PLoS Genet*,  
518 9(10): e1003872.
- 519 Weiner, S. A. and Toth, A. L. 2012. Epigenetics in social insects: a new direction for understanding  
520 the evolution of castes. *Genetics research international*, 2012: 609810.
- 521 Welch, M. and Lister, R. 2014. Epigenomics and the control of fate, form and function in social  
522 insects. *Current Opinion in Insect Science*, 1: 31–38.
- 523 Whitehorn, P. R., O’Connor, S., Wackers, F. L., and Goulson, D. 2012. Neonicotinoid Pesticide  
524 Reduces Bumble Bee Colony Growth and Queen Production. *Science*, 336(6079): 351–352.

---

The epigenetic effects of neonicotinoids on bumblebees

---

- 525 Williams, G. R., Troxler, A., Retschnig, G., Roth, K., Yañez, O., Shutler, D., Neumann, P., and  
526 Gauthier, L. 2015. Neonicotinoid pesticides severely affect honey bee queens. *Scientific Reports*,  
527 5: 14621.
- 528 Wu, M.-C., Chang, Y.-W., Lu, K.-H., and Yang, E.-C. 2017. Gene expression changes in honey  
529 bees induced by sublethal imidacloprid exposure during the larval stage. *Insect Biochemistry and*  
530 *Molecular Biology*, 88: 12–20.
- 531 Yan, H., Simola, D. F., Bonasio, R., Liebig, J., Berger, S. L., and Reinberg, D. 2014. Eusocial insects  
532 as emerging models for behavioural epigenetics. *Nature Reviews Genetics*, 15(10): 677–688.
- 533 Yu, G., Wang, L.-G., Han, Y., and He, Q.-Y. 2012. clusterProfiler: an R Package for Comparing  
534 Biological Themes Among Gene Clusters. *OMICS: A Journal of Integrative Biology*, 16(5):  
535 284–287.
